# Supplementary material for: ISGF3 and STAT2/IRF9 Control Basal and IFN-Induced Transcription through Genome-Wide Binding of Phosphorylated and Unphosphorylated Complexes to Common ISRE-Containing ISGs
Source: MDPI journal article supplement (doi:10.3390/ijms242417635), 2023-12-18
Supplement: s1 [file s1]

SUPPLEMENTARY FIGURE S2

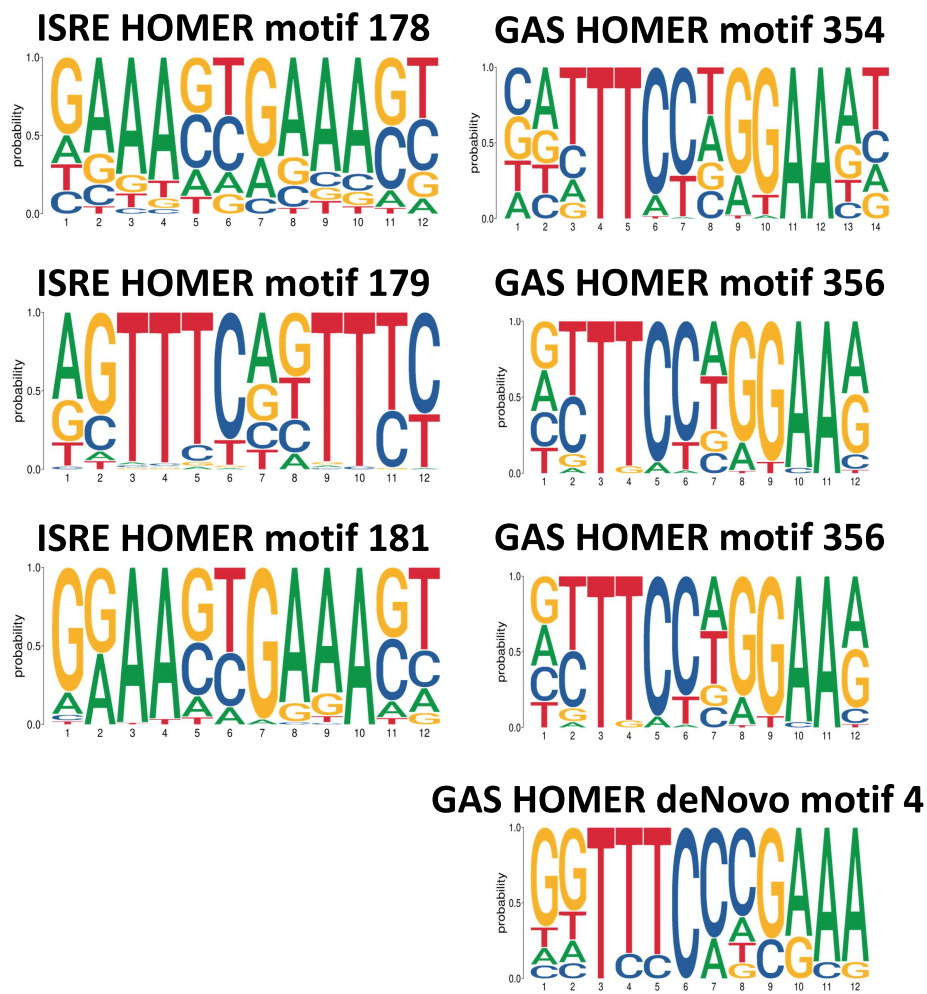

SUPPLEMENTARY FIGURE S3

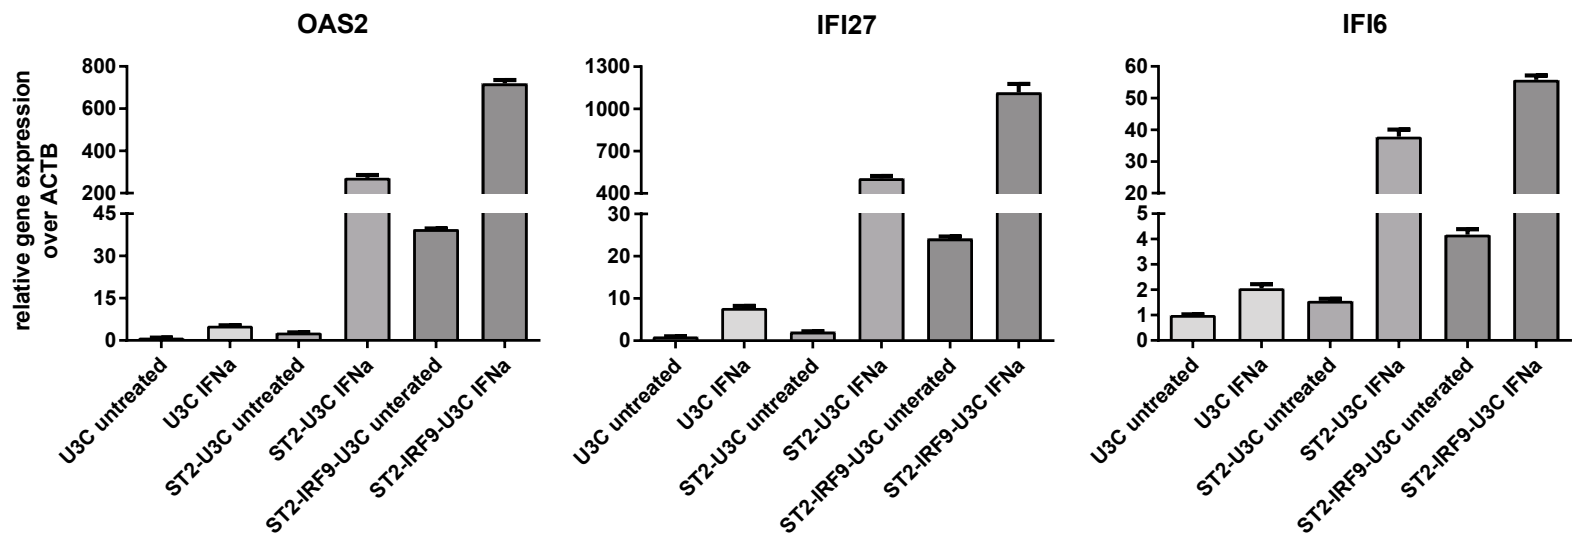

**Table S1.** Binding profiles statistical analysis.

2fTGH

| group1     | group2     | p        | p.adj    | p.format | p.signif |
|------------|------------|----------|----------|----------|----------|
| UN_STAT1   | 2h_STAT1   | 3,77E-07 | 2,30E-06 | 3,80E-07 | ****     |
| UN_STAT1   | 24h_STAT1  | 1,10E-04 | 3,30E-04 | 0,00011  | ***      |
| UN_STAT1   | 72h_STAT1  | 1,02E-03 | 2,00E-03 | 0,00102  | **       |
| 2h_STAT1   | 24h_STAT1  | 5,48E-06 | 2,20E-05 | 5,50E-06 | ****     |
| 2h_STAT1   | 72h_STAT1  | 1,52E-06 | 7,60E-06 | 1,50E-06 | ****     |
| 24h_STAT1  | 72h_STAT1  | 6,56E-02 | 6,60E-02 | 0,06563  | ns       |
| UN_STAT2   | 2h_STAT2   | 8,82E-06 | 5,30E-05 | 8,80E-06 | ****     |
| UN_STAT2   | 24h_STAT2  | 5,66E-04 | 1,10E-03 | 0,00057  | ***      |
| UN_STAT2   | 72h_STAT2  | 1,16E-05 | 5,80E-05 | 1,20E-05 | ****     |
| 2h_STAT2   | 24h_STAT2  | 1,71E-05 | 6,80E-05 | 1,70E-05 | ****     |
| 2h_STAT2   | 72h_STAT2  | 5,16E-05 | 1,50E-04 | 5,20E-05 | ****     |
| 24h_STAT2  | 72h_STAT2  | 7,82E-03 | 7,80E-03 | 0,00782  | **       |
| UN_IRF9    | 2h_IRF9    | 1,29E-04 | 5,20E-04 | 0,00013  | ***      |
| UN_IRF9    | 24h_IRF9   | 6,00E-06 | 3,00E-05 | 6,00E-06 | ****     |
| UN_IRF9    | 72h_IRF9   | 6,42E-08 | 3,90E-07 | 6,40E-08 | ****     |
| 2h_IRF9    | 24h_IRF9   | 1,04E-03 | 3,10E-03 | 0,00104  | **       |
| 2h_IRF9    | 72h_IRF9   | 1,67E-03 | 3,30E-03 | 0,00167  | **       |
| 24h_IRF9   | 72h_IRF9   | 3,63E-01 | 3,60E-01 | 0,36336  | ns       |
| UN_pSTAT1  | 2h_pSTAT1  | 4,16E-06 | 1,70E-05 | 4,20E-06 | ****     |
| UN_pSTAT1  | 24h_pSTAT1 | 1,58E-06 | 7,90E-06 | 1,60E-06 | ****     |
| UN_pSTAT1  | 72h_pSTAT1 | 1,21E-06 | 7,30E-06 | 1,20E-06 | ****     |
| 2h_pSTAT1  | 24h_pSTAT1 | 2,25E-02 | 6,70E-02 | 0,022    | *        |
| 2h_pSTAT1  | 72h_pSTAT1 | 3,21E-02 | 6,70E-02 | 0,032    | *        |
| 24h_pSTAT1 | 72h_pSTAT1 | 8,34E-01 | 8,30E-01 | 0,834    | ns       |
| UN_pSTAT2  | 2h_pSTAT2  | 1,83E-05 | 7,30E-05 | 1,80E-05 | ****     |
| UN_pSTAT2  | 24h_pSTAT2 | 3,21E-06 | 1,60E-05 | 3,20E-06 | ****     |
| UN_pSTAT2  | 72h_pSTAT2 | 2,10E-06 | 1,30E-05 | 2,10E-06 | ****     |
| 2h_pSTAT2  | 24h_pSTAT2 | 1,87E-02 | 5,60E-02 | 0,019    | *        |
| 2h_pSTAT2  | 72h_pSTAT2 | 2,16E-01 | 2,50E-01 | 0,216    | ns       |
| 24h_pSTAT2 | 72h_pSTAT2 | 1,25E-01 | 2,50E-01 | 0,125    | ns       |

Huh7.5

| group1     | group2     | p        | p.adj    | p.format | p.signif |
|------------|------------|----------|----------|----------|----------|
| UN_STAT1   | 2h_STAT1   | 1,55E-07 | 6,20E-07 | 1,50E-07 | ****     |
| UN_STAT1   | 24h_STAT1  | 2,35E-08 | 1,20E-07 | 2,40E-08 | ****     |
| UN_STAT1   | 72h_STAT1  | 8,51E-09 | 5,10E-08 | 8,50E-09 | ****     |
| 2h_STAT1   | 24h_STAT1  | 1,39E-03 | 2,80E-03 | 0,00139  | **       |
| 2h_STAT1   | 72h_STAT1  | 1,07E-04 | 3,20E-04 | 0,00011  | ***      |
| 24h_STAT1  | 72h_STAT1  | 1,22E-01 | 1,20E-01 | 0,12201  | ns       |
| UN_STAT2   | 2h_STAT2   | 4,00E-10 | 2,40E-09 | 4,00E-10 | ****     |
| UN_STAT2   | 24h_STAT2  | 1,07E-08 | 5,30E-08 | 1,10E-08 | ****     |
| UN_STAT2   | 72h_STAT2  | 1,87E-08 | 7,50E-08 | 1,90E-08 | ****     |
| 2h_STAT2   | 24h_STAT2  | 3,63E-03 | 1,10E-02 | 0,0036   | **       |
| 2h_STAT2   | 72h_STAT2  | 3,66E-02 | 7,30E-02 | 0,0366   | *        |
| 24h_STAT2  | 72h_STAT2  | 3,81E-01 | 3,80E-01 | 0,3812   | ns       |
| UN_IRF9    | 2h_IRF9    | 7,00E-09 | 4,20E-08 | 7,00E-09 | ****     |
| UN_IRF9    | 24h_IRF9   | 2,01E-08 | 1,00E-07 | 2,00E-08 | ****     |
| UN_IRF9    | 72h_IRF9   | 2,17E-08 | 1,00E-07 | 2,20E-08 | ****     |
| 2h_IRF9    | 24h_IRF9   | 4,95E-01 | 4,90E-01 | 0,495    | ns       |
| 2h_IRF9    | 72h_IRF9   | 5,46E-02 | 1,60E-01 | 0,055    | ns       |
| 24h_IRF9   | 72h_IRF9   | 2,07E-01 | 4,10E-01 | 0,207    | ns       |
| UN_pSTAT1  | 2h_pSTAT1  | 1,00E-08 | 6,00E-08 | 1,00E-08 | ****     |
| UN_pSTAT1  | 24h_pSTAT1 | 1,20E-08 | 6,00E-08 | 1,20E-08 | ****     |
| UN_pSTAT1  | 72h_pSTAT1 | 1,51E-08 | 6,00E-08 | 1,50E-08 | ****     |
| 2h_pSTAT1  | 24h_pSTAT1 | 1,42E-04 | 4,30E-04 | 0,00014  | ***      |
| 2h_pSTAT1  | 72h_pSTAT1 | 6,61E-04 | 1,30E-03 | 0,00066  | ***      |
| 24h_pSTAT1 | 72h_pSTAT1 | 4,77E-01 | 4,80E-01 | 0,47719  | ns       |
| UN_pSTAT2  | 2h_pSTAT2  | 5,08E-10 | 3,00E-09 | 5,10E-10 | ****     |
| UN_pSTAT2  | 24h_pSTAT2 | 1,83E-08 | 9,20E-08 | 1,80E-08 | ****     |
| UN_pSTAT2  | 72h_pSTAT2 | 2,72E-08 | 1,10E-07 | 2,70E-08 | ****     |
| 2h_pSTAT2  | 24h_pSTAT2 | 3,77E-04 | 1,10E-03 | 0,00038  | ***      |
| 2h_pSTAT2  | 72h_pSTAT2 | 2,37E-02 | 4,70E-02 | 0,02369  | *        |
| 24h_pSTAT2 | 72h_pSTAT2 | 6,96E-02 | 7,00E-02 | 0,0696   | ns       |

## ST2-U3C

| group1     | group2     | p        | p.adj    | p.format | p.signif |
|------------|------------|----------|----------|----------|----------|
| UN_STAT2   | 2h_STAT2   | 1,45E-08 | 7,30E-08 | 1,50E-08 | ****     |
| UN_STAT2   | 24h_STAT2  | 1,27E-01 | 2,50E-01 | 0,13     | ns       |
| UN_STAT2   | 72h_STAT2  | 4,20E-09 | 2,50E-08 | 4,20E-09 | ****     |
| 2h_STAT2   | 24h_STAT2  | 1,52E-07 | 4,60E-07 | 1,50E-07 | ****     |
| 2h_STAT2   | 72h_STAT2  | 3,61E-01 | 3,60E-01 | 0,36     | ns       |
| 24h_STAT2  | 72h_STAT2  | 1,02E-07 | 4,10E-07 | 1,00E-07 | ****     |
| UN_IRF9    | 2h_IRF9    | 6,80E-05 | 2,70E-04 | 6,80E-05 | ****     |
| UN_IRF9    | 24h_IRF9   | 2,95E-05 | 1,50E-04 | 3,00E-05 | ****     |
| UN_IRF9    | 72h_IRF9   | 6,70E-10 | 4,00E-09 | 6,70E-10 | ****     |
| 2h_IRF9    | 24h_IRF9   | 8,74E-01 | 8,70E-01 | 0,8738   | ns       |
| 2h_IRF9    | 72h_IRF9   | 3,63E-03 | 1,10E-02 | 0,0036   | **       |
| 24h_IRF9   | 72h_IRF9   | 5,47E-03 | 1,10E-02 | 0,0055   | **       |
| UN_pSTAT2  | 2h_pSTAT2  | 1,80E-09 | 1,10E-08 | 1,80E-09 | ****     |
| UN_pSTAT2  | 24h_pSTAT2 | 7,30E-09 | 2,90E-08 | 7,30E-09 | ****     |
| UN_pSTAT2  | 72h_pSTAT2 | 1,78E-09 | 1,10E-08 | 1,80E-09 | ****     |
| 2h_pSTAT2  | 24h_pSTAT2 | 6,54E-01 | 1,00E+00 | 0,65     | ns       |
| 2h_pSTAT2  | 72h_pSTAT2 | 3,21E-01 | 9,60E-01 | 0,32     | ns       |
| 24h_pSTAT2 | 72h_pSTAT2 | 5,99E-01 | 1,00E+00 | 0,6      | ns       |

## Huh STAT1KO

| group1     | group2     | p        | p.adj    | p.format | p.signif |
|------------|------------|----------|----------|----------|----------|
| UN_STAT2   | 2h_STAT2   | 1,84E-03 | 3,70E-03 | 0,0018   | **       |
| UN_STAT2   | 24h_STAT2  | 3,21E-08 | 1,30E-07 | 3,20E-08 | ****     |
| UN_STAT2   | 72h_STAT2  | 3,96E-11 | 2,40E-10 | 4,00E-11 | ****     |
| 2h_STAT2   | 24h_STAT2  | 6,27E-07 | 1,90E-06 | 6,30E-07 | ****     |
| 2h_STAT2   | 72h_STAT2  | 4,00E-09 | 2,00E-08 | 4,00E-09 | ****     |
| 24h_STAT2  | 72h_STAT2  | 4,95E-01 | 5,00E-01 | 0,495    | ns       |
| UN_IRF9    | 2h_IRF9    | 1,12E-03 | 2,20E-03 | 0,0011   | **       |
| UN_IRF9    | 24h_IRF9   | 1,36E-08 | 5,40E-08 | 1,40E-08 | ****     |
| UN_IRF9    | 72h_IRF9   | 1,80E-11 | 1,10E-10 | 1,80E-11 | ****     |
| 2h_IRF9    | 24h_IRF9   | 5,17E-08 | 1,60E-07 | 5,20E-08 | ****     |
| 2h_IRF9    | 72h_IRF9   | 7,92E-11 | 4,00E-10 | 7,90E-11 | ****     |
| 24h_IRF9   | 72h_IRF9   | 5,10E-01 | 5,10E-01 | 0,5104   | ns       |
| UN_pSTAT2  | 2h_pSTAT2  | 1,88E-03 | 3,80E-03 | 0,0019   | **       |
| UN_pSTAT2  | 24h_pSTAT2 | 2,98E-08 | 1,20E-07 | 3,00E-08 | ****     |
| UN_pSTAT2  | 72h_pSTAT2 | 2,88E-11 | 1,70E-10 | 2,90E-11 | ****     |
| 2h_pSTAT2  | 24h_pSTAT2 | 7,71E-07 | 2,30E-06 | 7,70E-07 | ****     |
| 2h_pSTAT2  | 72h_pSTAT2 | 1,26E-08 | 6,30E-08 | 1,30E-08 | ****     |
| 24h_pSTAT2 | 72h_pSTAT2 | 1,83E-01 | 1,80E-01 | 0,1831   | ns       |

**Table S2.** Genes commonly upregulated in 2fTGH vs Huh7.5 (WTs,  $\log_2FC \geq 1$ ) and ST1-ST2-IRF9-U3C ( $\log_2FC \geq 0,5$ ).

| Gene name | Log <sub>2</sub> FC | padj        |
|-----------|---------------------|-------------|
| APOL1     | 1,179548695         | 0,004684412 |
| APOL6     | 1,004077196         | 0,038984999 |
| BST2      | 6,135203905         | 1,35927E-50 |
| C1R       | 1,408098465         | 0,031410471 |
| CASP1     | 1,910053199         | 0,015147452 |
| DDX60     | 1,821430803         | 0,000316359 |
| DENND2D   | 2,789095461         | 0,048039125 |
| DTX3L     | 1,352686939         | 0,000116872 |
| EIF2AK2   | 1,52332203          | 3,34411E-07 |
| ERAP1     | 0,965079469         | 0,000499671 |
| ERAP2     | 1,130778979         | 0,003692999 |
| HELZ2     | 0,96070728          | 0,014920517 |
| HERC6     | 1,618186178         | 0,000600321 |
| HLA-B     | 1,178511842         | 0,001660318 |
| HLA-C     | 1,456434161         | 1,75465E-07 |
| IFI27     | 4,788538368         | 0,000413159 |
| IFI6      | 4,034905117         | 3,7793E-25  |
| IFIT1     | 3,212109227         | 1,06397E-13 |
| IFIT2     | 2,829436266         | 5,97437E-05 |
| IFIT3     | 1,906823009         | 4,21176E-05 |
| IFITM1    | 2,733004839         | 5,38304E-20 |
| IFITM3    | 0,752739796         | 0,007072815 |
| IRF9      | 7,842346026         | 1,87668E-80 |
| ISG15     | 1,562830472         | 2,90124E-05 |
| NRP2      | 0,870136135         | 0,002302707 |
| OAS1      | 1,471623318         | 0,002759109 |
| OAS2      | 4,639318222         | 1,20916E-26 |
| OAS3      | 0,941039617         | 0,028400103 |
| PARP10    | 1,009511582         | 0,001614949 |
| PARP14    | 1,66043833          | 3,31686E-08 |
| PARP9     | 1,619836156         | 4,81902E-05 |
| PDGFRL    | 2,314318252         | 0,013940482 |
| RTP4      | 3,339158993         | 0,001009013 |
| SAMHD1    | 1,284115233         | 0,009206662 |
| STAT1     | 3,374870457         | 2,50965E-06 |
| STAT2     | 5,052303916         | 1,9208E-92  |
| THEMIS2   | 1,173305564         | 0,035610056 |
| TRANK1    | 2,347593899         | 1,32527E-06 |
| UBA7      | 1,029286496         | 0,013001475 |
| UBE2L6    | 1,165570135         | 0,00053531  |
| USP18     | 3,111223801         | 4,5583E-06  |
| XAF1      | 3,694263817         | 1,24333E-05 |
| ZBTB42    | 1,070772287         | 0,031039847 |

**Table S3.** qPCR primers.

| Gene name    | Primer sequence         |                       |
|--------------|-------------------------|-----------------------|
|              | Forward                 | Reverse               |
| <i>GAPDH</i> | CAATATGATTCCACCCATGGCAA | GATCTCGCTCCTGGAAGATGG |
| <i>IFI27</i> | GTCAGTGGGAGCAACTGGAC    | GGGCAGGGAGCTAGTAGAAC  |
| <i>IFI6</i>  | ATCCTGAATGGGGGCGG       | AGATACTTGTGGGTGGCGTAG |
| <i>OAS2</i>  | CAATCAGCGAGGCCAGTAAT    | TCCAGGTTGGGAGAAGTCAA  |
| <i>IFIT1</i> | CTTGCAGGAAACACCCACTT    | CCTCTAGGCTGCCCTTTTGT  |

**Table S4.** ChIP-PCR primers.

| Gene name    | Primer sequence        |                       |
|--------------|------------------------|-----------------------|
|              | Forward                | Reverse               |
| <i>NANOG</i> | TGGTAGACGGGATTAAGTGAAG | GAAGGCTCTATCACCTTAGA  |
| <i>OAS2</i>  | CGCTGCAGTGGGTGGAGAGA   | GCCGGCAAGACAGTGAATGG  |
| <i>IFI27</i> | CTTCTGGACTGCGCATGAGG   | CCACCCCGACTGAAGCACTG  |
| <i>IFIT1</i> | GCAGGAATTCCGCTAGCTTT   | GCTAAACAGCAGCCAATGGT  |
| <i>ISG15</i> | AGGGAAACCGAAACTGAAGC   | TGAGGCACACACGTCAGG    |
| <i>STAT1</i> | CGCTCAGCCAATTAGACGC    | GTAAACAGAACGCCAGTTCCC |
| <i>STAT2</i> | TGTCACCAAGCAGGCTGTC    | TCTGTTCTGTTAGGCTCAGGC |
| <i>IRF9</i>  | AGATGCTGCTGCCCTCTAGT   | CCCCTTTCTACAGTCCCCA   |
